# Supplementary material for: Development of Automated Mechanical Transmission Model to Evaluate TCU Control Logic
Source: Oxford University Press journal article supplement (doi:10.1242/jeb.244677), 2010-01-01
Supplement: jeb244677supp.pdf [file jeb244677supp.pdf]

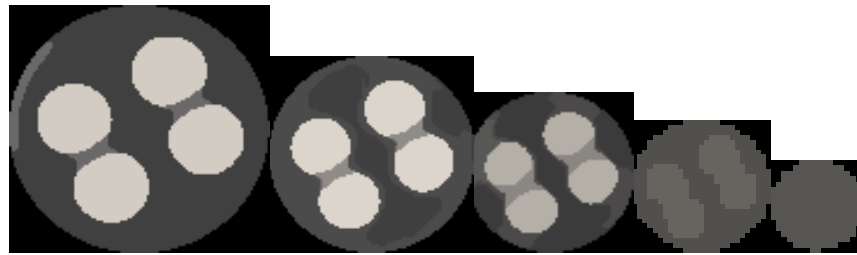

**Fig. S1.** Example of stimulus 1 in the achromatic treatment following acuity modelling & image resizing, RNL ranked filtering and RNL clustering over a modelled viewing distance of 2cm, 5cm, 10cm, 30cm and 50cm (left to right). Note the pronounced change in pattern & contrast over distance, including intermediate zones. RGB reconstructions based on the modelled cone stimulation of a triggerfish. Brightness and contrast adjusted for better visibility of pattern geometry.

**Table S1. Summary of all 17 parameters used in this study. For a detailed explanation of all parameters and their mathematical formulation, please see van den Berg et al. 2020b. The different analyses are colour coded throughout the manuscript.**

| Parameter Abbreviation | Parameter name                          | Parameter meaning                                                                                                                                          |
|------------------------|-----------------------------------------|------------------------------------------------------------------------------------------------------------------------------------------------------------|
| GabRat                 | Gabor Ratio                             | Average ratio of luminance edges at right angle to stimulus outline to luminance edges (measured as dbi stimulation) parallel with the stimulus outline    |
| Lum.skew               | LEIA luminance skewness                 | Skewness of histogram of all luminance edges measured in $\Delta S$ at the scale of an edge detecting receptive field                                      |
| Lum.mean               | LEIA mean luminance                     | Mean of luminance edges measured in $\Delta S$ at the scale of an edge detecting receptive field                                                           |
| Lum. kurt              | LEIA luminance kurtosis                 | Kurtosis of histogram of all luminance edges measured in $\Delta S$ at the scale of an edge detecting receptive field                                      |
| Lum.CoV                | LEIA luminance coefficient of variation | Coefficient of variation (mean relative to standard deviation) of luminance edges measured in $\Delta S$ at the scale of an edge detecting receptive field |
| Lum.sd                 | LEIA luminance standard deviation       | Standard deviation of luminance edges measured in $\Delta S$ at the scale of an edge detecting receptive field                                             |
| Col.skew               | LEIA chromatic skewness                 | Skewness of histogram of all chromatic edges measured in $\Delta S$ at the scale of an edge detecting receptive field                                      |
| Col.mean               | LEIA mean chromaticity                  | Mean of chromatic edges measured in $\Delta S$ at the scale of an edge detecting receptive field                                                           |
| Col.kurt               | LEIA chromatic kurtosis                 | Kurtosis of histogram of all chromatic edges measured in $\Delta S$ at the scale of an edge detecting receptive field                                      |
| Col.CoV                | LEIA chromatic coefficient of variation | Coefficient of variation (mean relative to standard deviation) of chromatic edges measured                                                                 |

|             |                                                              |                                                                                                                                |
|-------------|--------------------------------------------------------------|--------------------------------------------------------------------------------------------------------------------------------|
|             |                                                              | in $\Delta S$ at the scale of an edge detecting receptive field                                                                |
| Col.sd      | LEIA chromatic standard deviation                            | Standard deviation of chromatic edges measured in $\Delta S$ at the scale of an edge detecting receptive field                 |
| BSA.BML     | BSA weighted mean boundary luminance contrast                | Abundance weighted mean of luminance edges measured as Michelson contrast of double cone stimulation between pattern elements  |
| BSA.BsL     | BSA standard deviation of boundary luminance contrast        | Standard deviation of luminance edges measured as Michelson contrast of double cone stimulation between pattern elements       |
| BSA.BCVL    | BSA coefficient of variation of boundary luminance contrast  | Coefficient of variation of luminance edges measured as Michelson contrast of double cone stimulation between pattern elements |
| BSA.BMSsat  | BSA weighted mean boundary saturation contrast               | Abundance weighted mean of chromatic edges measured as Michelson contrast of chromatic $\Delta S$ between pattern elements     |
| BSA.BsSsat  | BSA standard deviation of boundary saturation contrast       | Standard deviation of chromatic edges measured as Michelson contrast of chromatic $\Delta S$ between pattern elements          |
| BSA.BCVSsat | BSA coefficient of variation of boundary saturation contrast | Coefficient of variation of chromatic edges measured as Michelson contrast of chromatic $\Delta S$ between pattern elements    |

**Table S2.** All significant correlations tested for each viewing distance (D) (single parameter linear mixed effect regression models). Only parameters with significant (p) interactions are listed.

| stimulus only |    |        |       |      | stimulus vs. background |    |        |       |      | stimulus only           |    |        |       |      | stimulus only |    |        |       |      | stimulus vs. background |    |        |       |      |
|---------------|----|--------|-------|------|-------------------------|----|--------|-------|------|-------------------------|----|--------|-------|------|---------------|----|--------|-------|------|-------------------------|----|--------|-------|------|
| Parm          | D  | p      | F     | %    | Parm                    | D  | p      | F     | %    | Parm                    | D  | p      | F     | %    | Parm          | D  | p      | F     | %    | Parm                    | D  | p      | F     | %    |
| BSA.BsL       | 5  | <0.001 | 13.75 | 1.52 | Lum.CoV                 | 5  | <0.001 | 25.50 | 1.56 | GabRat                  | 10 | <0.001 | 12.45 | 1.65 | Lum.CoV       | 5  | <0.001 | 25.91 | 1.58 | Lum.CoV                 | 5  | <0.001 | 25.5  | 1.56 |
| Lum.CoV       | 2  | <0.001 | 12.53 | 1.40 | Lum.mean                | 2  | <0.001 | 24.77 | 1.51 | GabRat                  | 5  | 0.006  | 7.58  | 1.00 | Lum.CoV       | 2  | <0.001 | 25.62 | 1.56 | Lum.mean                | 2  | <0.001 | 24.77 | 1.51 |
| BSA.BCVL      | 5  | <0.001 | 12.67 | 1.39 | Lum.CoV                 | 2  | <0.001 | 23.38 | 1.43 | BSA.BMSsat              | 30 | 0.007  | 7.35  | 0.97 | BSA.BCVL      | 5  | <0.001 | 25.23 | 1.53 | Lum.CoV                 | 2  | <0.001 | 23.38 | 1.43 |
| BSA.BCVL      | 10 | 0.001  | 10.88 | 1.21 | Col.mean                | 30 | <0.001 | 23.15 | 1.42 | Col.sd                  | 2  | 0.008  | 7.15  | 0.94 | BSA.BCVL      | 10 | <0.001 | 23.71 | 1.44 | Col.mean                | 30 | <0.001 | 23.15 | 1.42 |
| Lum.CoV       | 5  | 0.001  | 10.36 | 1.16 | Lum.CoV                 | 10 | <0.001 | 22.40 | 1.37 | Col.sd                  | 5  | 0.010  | 6.64  | 0.88 | Col.mean      | 30 | <0.001 | 23.50 | 1.44 | Lum.CoV                 | 10 | <0.001 | 22.4  | 1.37 |
| Col.mean      | 30 | 0.004  | 8.36  | 0.93 | Lum.mean                | 5  | <0.001 | 20.75 | 1.26 | BSA.BsSsat              | 10 | 0.013  | 6.25  | 0.84 | Col.sd        | 30 | <0.001 | 21.30 | 1.31 | Lum.mean                | 5  | <0.001 | 20.75 | 1.26 |
| Col.mean      | 10 | 0.005  | 7.98  | 0.88 | BSA.BCVL                | 10 | <0.001 | 20.42 | 1.24 | Col.mean                | 30 | 0.016  | 5.89  | 0.78 | Lum.CoV       | 10 | <0.001 | 21.03 | 1.28 | BSA.BCVL                | 10 | <0.001 | 20.42 | 1.24 |
| Lum.skew      | 2  | 0.007  | 7.32  | 0.82 | Col.sd                  | 10 | <0.001 | 20.09 | 1.22 | Col.sd                  | 10 | 0.027  | 4.93  | 0.65 | BSA.BML       | 5  | <0.001 | 20.61 | 1.25 | Col.sd                  | 10 | <0.001 | 20.09 | 1.22 |
| Lum.mean      | 30 | 0.008  | 7.14  | 0.80 | Col.sd                  | 5  | <0.001 | 20.06 | 1.22 | Lum.mean                | 30 | 0.030  | 4.72  | 0.62 | Col.sd        | 10 | <0.001 | 20.20 | 1.23 | Col.sd                  | 5  | <0.001 | 20.06 | 1.22 |
| BSA.BML       | 10 | 0.008  | 7.01  | 0.78 | Col.sd                  | 2  | <0.001 | 19.87 | 1.21 | BSA.BsL                 | 10 | 0.037  | 4.36  | 0.58 | Col.sd        | 5  | <0.001 | 20.11 | 1.22 | Col.sd                  | 2  | <0.001 | 19.87 | 1.21 |
| Col.sd        | 2  | 0.009  | 6.87  | 0.76 | Col.sd                  | 30 | <0.001 | 19.51 | 1.20 | Lum.CoV                 | 5  | 0.039  | 4.30  | 0.57 | Col.sd        | 2  | <0.001 | 19.93 | 1.21 | Col.sd                  | 30 | <0.001 | 19.51 | 1.2  |
| Col.sd        | 10 | 0.011  | 6.55  | 0.73 | BSA.BML                 | 10 | <0.001 | 19.26 | 1.18 | Col.sd                  | 30 | 0.047  | 3.97  | 0.52 | Col.CoV       | 2  | <0.001 | 18.99 | 1.16 | BSA.BML                 | 10 | <0.001 | 19.26 | 1.18 |
| Col.mean      | 2  | 0.011  | 6.51  | 0.72 | BSA.BCVL                | 2  | <0.001 | 16.14 | 0.98 | Lum.CoV                 | 10 | 0.049  | 3.90  | 0.52 | BSA.BML       | 10 | <0.001 | 18.92 | 1.15 | BSA.BCVL                | 2  | <0.001 | 16.14 | 0.98 |
| Col.sd        | 5  | 0.011  | 6.44  | 0.71 | Col.mean                | 10 | <0.001 | 15.42 | 0.94 | stimulus vs. background |    |        |       |      | Lum.mean      | 2  | <0.001 | 18.49 | 1.12 | Col.mean                | 10 | <0.001 | 15.42 | 0.94 |
| Lum.CoV       | 10 | 0.012  | 6.28  | 0.70 | Lum.mean                | 30 | <0.001 | 14.64 | 0.89 | Parm                    | D  | p      | F     | %    | Col.CoV       | 5  | <0.001 | 18.22 | 1.12 | Lum.mean                | 30 | <0.001 | 14.64 | 0.89 |
| Col.mean      | 5  | 0.013  | 6.18  | 0.68 | Col.mean                | 5  | <0.001 | 14.60 | 0.89 | GabRat                  | 10 | <0.001 | 12.45 | 1.65 | Col.mean      | 2  | <0.001 | 18.05 | 1.10 | Col.mean                | 5  | <0.001 | 14.6  | 0.89 |
| Lum.skew      | 5  | 0.017  | 5.73  | 0.64 | BSA.BCVL                | 5  | <0.001 | 14.26 | 0.87 | BSA.BsSsat              | 30 | 0.001  | 11.74 | 1.54 | Col.mean      | 5  | <0.001 | 17.75 | 1.08 | BSA.BCVL                | 5  | <0.001 | 14.26 | 0.87 |
| BSA.BML       | 30 | 0.017  | 5.69  | 0.64 | Lum.skew                | 10 | <0.001 | 14.11 | 0.86 | Lum.skew                | 10 | 0.006  | 7.67  | 1.01 | Lum.skew      | 2  | <0.001 | 17.39 | 1.06 | Lum.skew                | 10 | <0.001 | 14.11 | 0.86 |
| Col.kurt      | 10 | 0.020  | 5.45  | 0.61 | Col.mean                | 2  | <0.001 | 13.77 | 0.84 | GabRat                  | 5  | 0.006  | 7.58  | 1.00 | Col.mean      | 10 | <0.001 | 17.46 | 1.06 | Col.mean                | 2  | <0.001 | 13.77 | 0.84 |
| Lum.mean      | 2  | 0.020  | 5.42  | 0.61 | Lum.mean                | 10 | <0.001 | 13.58 | 0.83 | Lum.kurt                | 5  | 0.007  | 7.36  | 0.98 | Lum.skew      | 5  | <0.001 | 16.48 | 1.01 | Col.mean                | 50 | <0.001 | 13.61 | 0.84 |
| BSA.BML       | 5  | 0.020  | 5.44  | 0.60 | Col.CoV                 | 2  | <0.001 | 12.45 | 0.76 | Lum.kurt                | 10 | 0.008  | 7.11  | 0.93 | Lum.mean      | 5  | <0.001 | 15.14 | 0.92 | Lum.mean                | 10 | <0.001 | 13.58 | 0.83 |
| GabRat        | 2  | 0.023  | 5.17  | 0.58 | Col.CoV                 | 5  | 0.001  | 11.64 | 0.71 | BSA.BsL                 | 10 | 0.010  | 6.68  | 0.88 | BSA.BCVL      | 2  | <0.001 | 14.24 | 0.86 | Col.CoV                 | 2  | <0.001 | 12.45 | 0.76 |
| Col.kurt      | 50 | 0.024  | 5.13  | 0.57 | Lum.sd                  | 2  | 0.001  | 10.78 | 0.66 | BSA.BsSsat              | 10 | 0.014  | 6.14  | 0.82 | Col.CoV       | 10 | <0.001 | 13.55 | 0.83 | Col.CoV                 | 5  | 0.001  | 11.64 | 0.71 |
| BSA.BMSsat    | 2  | 0.025  | 5.07  | 0.56 | BSA.BMSsat              | 30 | 0.001  | 10.38 | 0.63 | Lum.mean                | 2  | 0.013  | 6.15  | 0.81 | Lum.skew      | 10 | <0.001 | 12.80 | 0.78 | Lum.sd                  | 2  | 0.001  | 10.78 | 0.66 |
| GabRat        | 5  | 0.028  | 4.86  | 0.54 | Lum.kurt                | 10 | 0.002  | 9.62  | 0.59 | Col.mean                | 30 | 0.026  | 5.00  | 0.66 | Lum.kurt      | 2  | <0.001 | 12.44 | 0.76 | BSA.BMSsat              | 30 | 0.001  | 10.38 | 0.63 |
| Lum.kurt      | 2  | 0.028  | 4.84  | 0.54 | Lum.kurt                | 5  | 0.002  | 9.34  | 0.57 | BSA.BMSsat              | 30 | 0.032  | 4.64  | 0.61 | BSA.BsSsat    | 10 | 0.001  | 12.20 | 0.75 | Lum.kurt                | 10 | 0.002  | 9.62  | 0.59 |
| BSA.BsSsat    | 30 | 0.033  | 4.58  | 0.51 | Col.CoV                 | 30 | 0.003  | 8.89  | 0.54 | Lum.CoV                 | 5  | 0.046  | 3.98  | 0.53 | BSA.BsL       | 5  | 0.001  | 12.08 | 0.73 | Lum.kurt                | 5  | 0.002  | 9.34  | 0.57 |
| Col.kurt      | 30 | 0.035  | 4.49  | 0.50 | BSA.BsL                 | 10 | 0.003  | 8.77  | 0.53 | Lum.mean                | 5  | 0.048  | 3.94  | 0.52 | Lum.mean      | 30 | 0.001  | 11.95 | 0.73 | Col.CoV                 | 30 | 0.003  | 8.89  | 0.54 |
| Col.kurt      | 5  | 0.037  | 4.39  | 0.49 | BSA.BCVSsat             | 5  | 0.004  | 8.14  | 0.50 | Lum.mean                | 30 | 0.049  | 3.89  | 0.52 | BSA.BsSsat    | 2  | 0.001  | 11.59 | 0.71 | BSA.BsL                 | 10 | 0.003  | 8.77  | 0.53 |
| Col.sd        | 30 | 0.048  | 3.92  | 0.43 | BSA.BsSsat              | 2  | 0.013  | 6.15  | 0.38 |                         |    |        |       |      | Lum.kurt      | 5  | 0.001  | 11.23 | 0.69 | BSA.BCVSsat             | 5  | 0.004  | 8.14  | 0.5  |
|               |    |        |       |      | Lum.sd                  | 30 | 0.013  | 6.14  | 0.38 |                         |    |        |       |      | BSA.BCVSsat   | 5  | 0.001  | 11.03 | 0.68 | BSA.BsSsat              | 2  | 0.013  | 6.15  | 0.38 |
|               |    |        |       |      | Col.CoV                 | 10 | 0.015  | 5.89  | 0.36 |                         |    |        |       |      | Lum.mean      | 10 | 0.001  | 10.87 | 0.66 | Lum.sd                  | 30 | 0.013  | 6.14  | 0.38 |
|               |    |        |       |      | Col.skew                | 2  | 0.015  | 5.93  | 0.36 |                         |    |        |       |      | BSA.BCVSsat   | 10 | 0.002  | 10.06 | 0.62 | Col.CoV                 | 10 | 0.015  | 5.89  | 0.36 |
|               |    |        |       |      | BSA.BsSsat              | 10 | 0.020  | 5.39  | 0.33 |                         |    |        |       |      | BSA.BML       | 2  | 0.002  | 9.46  | 0.57 | Col.skew                | 2  | 0.015  | 5.93  | 0.36 |
|               |    |        |       |      | BSA.BML                 | 5  | 0.022  | 5.23  | 0.32 |                         |    |        |       |      | BSA.BCVL      | 30 | 0.002  | 9.27  | 0.57 | BSA.BsSsat              | 10 | 0.02   | 5.39  | 0.33 |
|               |    |        |       |      | Lum.sd                  | 5  | 0.033  | 4.56  | 0.28 |                         |    |        |       |      | BSA.BsL       | 10 | 0.004  | 8.28  | 0.50 | BSA.BML                 | 5  | 0.022  | 5.23  | 0.32 |
|               |    |        |       |      | Lum.CoV                 | 30 | 0.035  | 4.43  | 0.27 |                         |    |        |       |      | Lum.kurt      | 10 | 0.005  | 7.90  | 0.48 | Lum.sd                  | 5  | 0.033  | 4.56  | 0.28 |
|               |    |        |       |      | Col.kurt                | 2  | 0.039  | 4.25  | 0.26 |                         |    |        |       |      | Lum.sd        | 30 | 0.006  | 7.65  | 0.47 | Lum.CoV                 | 30 | 0.035  | 4.43  | 0.27 |
|               |    |        |       |      | Col.skew                | 5  | 0.044  | 4.05  | 0.25 |                         |    |        |       |      | BSA.BsSsat    | 5  | 0.007  | 7.30  | 0.45 | Col.kurt                | 2  | 0.039  | 4.25  | 0.26 |
|               |    |        |       |      | Col.kurt                | 10 | 0.046  | 4.00  | 0.24 |                         |    |        |       |      | Lum.sd        | 2  | 0.008  | 7.02  | 0.43 | Col.skew                | 5  | 0.044  | 4.05  | 0.25 |
|               |    |        |       |      | BSA.BCVL                | 30 | 0.047  | 3.96  | 0.24 |                         |    |        |       |      | BSA.BMSsat    | 30 | 0.016  | 5.78  | 0.35 | Col.kurt                | 10 | 0.046  | 4     | 0.24 |
|               |    |        |       |      |                         |    |        |       |      |                         |    |        |       |      | BSA.BCVSsat   | 2  | 0.022  | 5.26  | 0.32 | BSA.BCVL                | 30 | 0.047  | 3.96  | 0.24 |

**Table S3.** Summary of best models using pcr regression for each viewing distance (dist). The % of the variation in the data (% var), the % of explained variation in time to detection (% var resp) as well as the number of principal components (PC) are listed.

| Combined     |      |       |            |     | Chromatic   |      |       |            |     |
|--------------|------|-------|------------|-----|-------------|------|-------|------------|-----|
| ROI          | Dist | % var | % var resp | PCs | ROI         | Dist | % var | % var resp | PCs |
| Stim         | 2cm  | 62.66 | 3.18       | 3   | Stimulus    | 2cm  | 23.55 | 0.11       | 1   |
| Stim         | 5cm  | 47.84 | 3          | 2   | Stimulus    | 5cm  | 99.79 | 5.05       | 13  |
| Stim         | 10cm | 98.18 | 5.16       | 11  | Stimulus    | 10cm | 91.14 | 2.67       | 6   |
| Stim         | 30cm | 99.95 | 5.73       | 15  | Stimulus    | 30cm | 96.21 | 6.33       | 8   |
| Stim vs. BG  | 2cm  | 96.66 | 4.37       | 8   | Stim vs. BG | 2cm  | 99.3  | 2.82       | 9   |
| Stim vs. BG  | 5cm  | 94.65 | 3.77       | 7   | Stim vs. BG | 5cm  | 94.85 | 2.37       | 7   |
| Stim vs. BG  | 10cm | 38.08 | 2.96       | 1   | Stim vs. BG | 10cm | 38.72 | 0.35       | 1   |
| Stim vs. BG  | 30cm | 99.58 | 4.7        | 9   | Stim vs. BG | 30cm | 99.96 | 4.2        | 9   |
| Achromatic   |      |       |            |     |             |      |       |            |     |
| ROI          | Dist | % var | % var resp | PCs |             |      |       |            |     |
| Stim         | 2cm  | 80.14 | 2.16       | 5   |             |      |       |            |     |
| Stim         | 5cm  | 57.77 | 1.32       | 3   |             |      |       |            |     |
| Stim         | 10cm | 24.57 | 0.97       | 1   |             |      |       |            |     |
| Stim         | 30cm | 54.88 | 1.81       | 2   |             |      |       |            |     |
| Stim vs. BG  | 2cm  | 92.93 | 3.32       | 6   |             |      |       |            |     |
| Stim vs. BG  | 5cm  | 30.21 | 1.07       | 1   |             |      |       |            |     |
| Stim vs. BG  | 10cm | 49.53 | 0.93       | 2   |             |      |       |            |     |
| Stims vs. BG | 30cm | 96.62 | 2          | 6   |             |      |       |            |     |

**Table S4.** Summary of all stepwise regression analyses.

| ROI         | Treatment  | Dist | Retained pattern statistics                                                                                                                   | % var expl |
|-------------|------------|------|-----------------------------------------------------------------------------------------------------------------------------------------------|------------|
| Stimulus    | Achromatic | 2cm  | BSA.BML + Lum.CoV                                                                                                                             | 2.45       |
| Stimulus    | Chromatic  | 2cm  | Lum.mean                                                                                                                                      | 0.81       |
| Stimulus    | Achromatic | 5cm  | Lum.CoV                                                                                                                                       | 1.40       |
| Stimulus    | Chromatic  | 5cm  | BSA.BCVSsat + BSA.BML + BSA.BMSsat + BSA.BsL + BSA.BsSsat + Col.CoV + Col.kurt + Col.mean + Col.sd                                            | 1.89       |
| Stimulus    | Achromatic | 10cm | BSA.BCVL + BSA.BCVSsat + BSA.BsSsat + Col.skew + Lum.CoV                                                                                      | 2.45       |
| Stimulus    | Chromatic  | 10cm | BSA.BMSsat + BSA.BsL + GabRat                                                                                                                 | 2.67       |
| Stimulus    | Achromatic | 30cm | BSA.BCVSsat + Col.CoV + Col.mean                                                                                                              | 2.92       |
| Stimulus    | Chromatic  | 30cm | BSA.BML + BSA.BMSsat + BSA.BsSsat                                                                                                             | 4.18       |
| Stim vs. BG | Achromatic | 2cm  | BSA.BMSsat + Lum.CoV                                                                                                                          | 2.58       |
| Stim vs. BG | Chromatic  | 2cm  | Col.sd                                                                                                                                        | 0.94       |
| Stim vs. BG | Achromatic | 5cm  | BSA.BCVL + Col.skew + GabRat + Lum.CoV + Lum.kurt                                                                                             | 3.53       |
| Stim vs. BG | Chromatic  | 5cm  | BSA.BCVSsat + Col.sd + GabRat + Lum.kurt                                                                                                      | 2.18       |
| Stim vs. BG | Achromatic | 10cm | BSA.BCVL + Col.kurt                                                                                                                           | 1.98       |
| Stim vs. BG | Chromatic  | 10cm | BSA.BCVSsat + BSA.BMSsat + Col.sd + GabRat + Lum.CoV + Lum.kurt                                                                               | 3.53       |
| Stim vs. BG | Achromatic | 30cm | BSA.BCVL + BSA.BCVSsat + BSA.BML + BSA.BsSsat + Col.kurt + Col.mean + Lum.mean                                                                | 2.94       |
| Stim vs. BG | Chromatic  | 30cm | BSA.BCVSsat + BSA.BMSsat + BSA.BsSsat + GabRat + Lum.mean                                                                                     | 2.77       |
| Stimulus    | Combined   | 2cm  | BSA.BCVSsat + BSA.BMSsat + Col.mean + Col.skew + GabRat + Lum.kurt + Lum.mean + Lum.skew                                                      | 3.34       |
| Stimulus    | Combined   | 5cm  | BSA.BCVSsat + BSA.BML + BSA.BsSsat + Col.mean + GabRat + Lum.CoV                                                                              | 2.27       |
| Stimulus    | Combined   | 10cm | BSA.BCVL + BSA.BCVSsat + BSA.BML + BSA.BMSsat + BSA.BsL + BSA.BsSsat + Col.CoV + Col.mean + Col.skew + GabRat + Lum.CoV + Lum.kurt + Lum.mean | 3.41       |
| Stimulus    | Combined   | 30cm | BSA.BCVSsat + BSA.BML + BSA.BMSsat + BSA.BsSsat + Col.CoV + Col.mean                                                                          | 3.37       |
| Stimulus    | Combined   | 50cm | Col.mean                                                                                                                                      | 0.84       |
| Stim vs. BG | Combined   | 2cm  | BSA.BMSsat + Col.mean + Lum.CoV                                                                                                               | 2.38       |
| Stim vs. BG | Combined   | 5cm  | BSA.BsL + Col.mean + GabRat + Lum.mean                                                                                                        | 2.49       |
| Stim vs. BG | Combined   | 10cm | BSA.BCVL + BSA.BML + BSA.BsL + Col.kurt + Col.mean + GabRat + Lum.mean                                                                        | 2.57       |
| Stim vs. BG | Combined   | 30cm | BSA.BCVSsat + BSA.BML + BSA.BMSsat + BSA.BsL + BSA.BsSsat + Col.kurt + Col.sd + GabRat + Lum.mean + Lum.sd                                    | 3.06       |
